# Supplementary material for: The Disease Model of Addiction: The Impact of Genetic Variability in the Oxidative Stress and Inflammation Pathways on Alcohol Dependance and Comorbid Psychosymptomatology
Source: MDPI journal article supplement (doi:10.3390/antiox13010020), 2023-12-21
Supplement: s1 [file s1]

# The Disease Model of Addiction: The Impact of Genetic Variability in the Oxidative Stress and Inflammation Pathways on Alcohol Dependence and Comorbid Psychosymptomatology

Evangelia Eirini Tsermpini <sup>1</sup>, Katja Goričar <sup>1</sup>, Blanka Kores Plesničar <sup>2,3</sup>, Anja Plemenitaš Ilješ <sup>4,\*</sup> and Vita Dolžan <sup>1,\*</sup>

<sup>1</sup> Pharmacogenetics Laboratory, Institute of Biochemistry and Molecular Genetics, Faculty of Medicine, University of Ljubljana, 1000 Ljubljana, Slovenia; evangelia.tsermpini@dal.ca (E.E.T.); katja.goricar@mf.uni-lj.si (K.G.)

<sup>2</sup> University Psychiatric Clinic, 1000 Ljubljana, Slovenia; blanka.kores@psih-klinika.si

<sup>3</sup> Faculty of Medicine, University of Ljubljana, 1000 Ljubljana, Slovenia

<sup>4</sup> Department of Psychiatry, University Clinical Centre Maribor, 2000 Maribor, Slovenia

\* Correspondence: anja.plemenitas@ukc-mb.si (A.P.I.); vita.dolzan@mf.uni-lj.si (V.D.)

## Supplementary material

Supplementary Table S1. Questionnaire traits and scores.

| Trait                           | Questionnaire    | Hospitalized alcohol-dependent patients (N=89) points, median (25-75%) | Healthy controls (N=93) points, median (25-75%) | P*     |
|---------------------------------|------------------|------------------------------------------------------------------------|-------------------------------------------------|--------|
| Obsession                       | YBOCS obsession  | 2 (1-7)                                                                | 1 (1-1)                                         | <0.001 |
| Compulsion                      | YBOCS compulsion | 1 (1-3)                                                                | 1 (1-1)                                         | <0.001 |
| Social phobia                   | BSPS             | 10 (4-18.5)                                                            | 9 (5.5-14)                                      | 0.693  |
| Alcohol-dependence severity     | AUDIT            | 23 (19-28.5)                                                           | 5 (4-7)                                         | <0.001 |
| Obsessive-compulsive drinking   | OCDS             | 18 (9-26.5)                                                            | 3 (2-4)                                         | <0.001 |
| Depression                      | Zung depression  | 34 (27-45)                                                             | 22 (20-24)                                      | <0.001 |
| Anxiety                         | Zung anxiety     | 34 (29-39)                                                             | 22 (20-24)                                      | <0.001 |
| Anger, hostility and aggression | BDHI             | 30 (22-40)                                                             | 17 (10.5-23)                                    | <0.001 |

\* Mann-Whitney test

**Supplementary Table S2.** The investigated genetic variants, their minor allele frequencies, and Hardy-Weinberg Equilibrium in controls.

| Gene            | SNP                    | Genotype | MAF (controls) (%) | P <sub>HWE</sub> (controls) |
|-----------------|------------------------|----------|--------------------|-----------------------------|
| <i>SOD2</i>     | rs4880 <sup>a</sup>    | CC       | 39.0               | 0.415                       |
|                 | p.Ala16Val             | CT       |                    |                             |
|                 |                        | TT       |                    |                             |
| <i>GPX1</i>     | rs1050450 <sup>b</sup> | CC       | 31.9               | 0.714                       |
|                 | p.Pro198Leu            | CT       |                    |                             |
|                 |                        | TT       |                    |                             |
| <i>PON1</i>     | rs705381 <sup>c</sup>  | CC       | 22.3               | 0.389                       |
|                 | c.-162C>T              | CT       |                    |                             |
|                 |                        | TT       |                    |                             |
| <i>PON1</i>     | rs705379 <sup>c</sup>  | GG       | 52.2               | 0.986                       |
|                 | c.-108G>A              | GA       |                    |                             |
|                 |                        | AA       |                    |                             |
| <i>PON1</i>     | rs854560 <sup>c</sup>  | AA       | 35.3               | 0.813                       |
|                 | p.Leu55Met             | AT       |                    |                             |
|                 |                        | TT       |                    |                             |
| <i>PON1</i>     | rs662                  | AA       | 29.6               | 0.289                       |
|                 | p.Gln192Arg            | AG       |                    |                             |
|                 |                        | GG       |                    |                             |
| <i>IL1B</i>     | rs1143623 <sup>c</sup> | GG       | 30.9               | 0.083                       |
|                 | c.-1560G>C             | GC       |                    |                             |
|                 |                        | CC       |                    |                             |
| <i>IL1B</i>     | rs16944 <sup>c</sup>   | TT       | 69.6               | 0.814                       |
|                 | c.-598T>C              | TC       |                    |                             |
|                 |                        | CC       |                    |                             |
| <i>IL1B</i>     | rs1071676 <sup>c</sup> | GG       | 31.0               | 0.568                       |
|                 | c.*505G>C              | GC       |                    |                             |
|                 |                        | CC       |                    |                             |
| <i>MIRN146A</i> | rs2910164              | GG       | 22.0               | 0.772                       |
|                 | n.60G>C                | GC       |                    |                             |
|                 |                        | CC       |                    |                             |
| <i>IL6</i>      | rs1800795 <sup>c</sup> | GG       | 44.0               | 0.358                       |
|                 | c.-174G>C              | GC       |                    |                             |
|                 |                        | CC       |                    |                             |
| <i>IL6R</i>     | rs2228145 <sup>a</sup> | AA       | 39.6               | 0.441                       |
|                 | p.Asp358Ala            | AC       |                    |                             |
|                 |                        | CC       |                    |                             |

<sup>a</sup>data missing for 2 controls, <sup>b</sup>data missing for 2 controls and 2 alcoholics, <sup>c</sup>data missing for 1 control

**Supplementary Table S3.** Comparison of genotype frequencies of genetic variants of oxidative stress pathways between hospitalized alcohol-addicted patients and healthy controls.

| Gene        | SNP       | Genotype | Patients<br>(N=89)<br>N (%) | Controls<br>(N=93)<br>N (%) | OR (95% CI)      | P     | OR (95% CI) <sub>adj</sub> | P <sub>adj</sub> |
|-------------|-----------|----------|-----------------------------|-----------------------------|------------------|-------|----------------------------|------------------|
| <i>SOD2</i> | rs4880    | CC       | 21 (23.6)                   | 32 (35.2)                   | Reference        |       | Reference                  |                  |
|             |           | CT       | 52 (58.4)                   | 47 (51.6)                   | 1.69 (0.86-3.32) | 0.131 | 1.34 (0.51-3.46)           | 0.552            |
|             |           | TT       | 16 (18)                     | 12 (13.2)                   | 2.03 (0.8-5.14)  | 0.135 | 1.54 (0.47-5.04)           | 0.471            |
|             |           | CT+TT    | 68 (76.4)                   | 59 (64.8)                   | 1.76 (0.92-3.37) | 0.090 | 1.39 (0.57-3.43)           | 0.472            |
| <i>GPX1</i> | rs1050450 | CC       | 44 (50.6)                   | 43 (47.3)                   | Reference        |       | Reference                  |                  |
|             |           | CT       | 38 (43.7)                   | 38 (41.8)                   | 0.98 (0.53-1.81) | 0.942 | 1.66 (0.7-3.92)            | 0.249            |
|             |           | TT       | 5 (5.7)                     | 10 (11)                     | 0.49 (0.15-1.55) | 0.223 | 0.59 (0.12-2.79)           | 0.502            |
|             |           | CT+TT    | 43 (49.4)                   | 48 (52.8)                   | 0.88 (0.49-1.58) | 0.658 | 1.4 (0.62-3.16)            | 0.420            |
| <i>PON1</i> | rs705381  | CC       | 51 (57.3)                   | 57 (62)                     | Reference        |       | Reference                  |                  |
|             |           | CT       | 30 (33.7)                   | 29 (31.5)                   | 1.16 (0.61-2.18) | 0.654 | 0.87 (0.36-2.12)           | 0.758            |
|             |           | TT       | 8 (9)                       | 6 (6.5)                     | 1.49 (0.48-4.59) | 0.487 | 0.66 (0.14-3.09)           | 0.599            |
|             |           | CT+TT    | 38 (42.7)                   | 35 (38)                     | 1.21 (0.67-2.2)  | 0.524 | 0.82 (0.36-1.9)            | 0.649            |
| <i>PON1</i> | rs705379  | GG       | 25 (28.1)                   | 21 (22.8)                   | Reference        |       | Reference                  |                  |
|             |           | GA       | 47 (52.8)                   | 46 (50)                     | 0.86 (0.42-1.74) | 0.672 | 1.52 (0.53-4.33)           | 0.431            |
|             |           | AA       | 17 (19.1)                   | 25 (27.2)                   | 0.57 (0.25-1.33) | 0.195 | 0.71 (0.22-2.32)           | 0.570            |
|             |           | GA+AA    | 64 (71.9)                   | 71 (77.2)                   | 0.76 (0.39-1.48) | 0.417 | 1.18 (0.44-3.14)           | 0.746            |
| <i>PON1</i> | rs854560  | AA       | 41 (46.1)                   | 39 (42.4)                   | Reference        |       | Reference                  |                  |
|             |           | AT       | 38 (42.7)                   | 41 (44.6)                   | 0.88 (0.47-1.64) | 0.691 | 1.08 (0.45-2.58)           | 0.862            |
|             |           | TT       | 10 (11.2)                   | 12 (13)                     | 0.79 (0.31-2.04) | 0.631 | 1.97 (0.53-7.23)           | 0.309            |
|             |           | AT+TT    | 48 (53.9)                   | 53 (57.6)                   | 0.86 (0.48-1.55) | 0.619 | 1.23 (0.54-2.8)            | 0.623            |
| <i>PON1</i> | rs662     | AA       | 45 (50.6)                   | 44 (47.3)                   | Reference        |       | Reference                  |                  |
|             |           | AG       | 34 (38.2)                   | 43 (46.2)                   | 0.77 (0.42-1.43) | 0.410 | 0.47 (0.2-1.14)            | 0.094            |
|             |           | GG       | 10 (11.2)                   | 6 (6.5)                     | 1.63 (0.55-4.87) | 0.382 | 2.03 (0.44-9.29)           | 0.362            |
|             |           | AG+GG    | 44 (49.4)                   | 49 (52.7)                   | 0.88 (0.49-1.57) | 0.661 | 0.62 (0.28-1.4)            | 0.252            |

Adj: adjusted for age, education, smoking, environment, and partnership

**Supplementary Table S4.** Associations between *SOD2* rs4880 and the selected psychosymptomatology scale scores for hospitalized alcohol-dependent patients and healthy controls.

| Scale            | <i>SOD2</i> rs4880 genotype | Patients (N=89)  |              | Controls (N=93) |       |
|------------------|-----------------------------|------------------|--------------|-----------------|-------|
|                  |                             | Median (25-75%)  | P*           | Median (25-75%) | P*    |
| YBOCS obsession  | CC                          | 1 (1-2)          | 0.054        | 1 (1-1)         | 0.607 |
|                  | CT                          | 2 (1-9)          |              | 1 (1-2)         |       |
|                  | TT                          | 3 (1-6.8)        |              | 1 (1-1.8)       |       |
|                  | CT+TT                       | 2 (1-8.8)        | <b>0.016</b> | 1 (1-2)         | 0.338 |
| YBOCS compulsion | CC                          | 1 (1-2)          | 0.130        | 1 (1-1)         | 0.236 |
|                  | CT                          | 1 (1-6)          |              | 1 (1-1)         |       |
|                  | TT                          | 2 (1-5.3)        |              | 1 (1-1)         |       |
|                  | CT+TT                       | 1 (1-6)          | <b>0.046</b> | 1 (1-1)         | 0.196 |
| BSPS             | CC                          | 9 (3-16.5)       | 0.790        | 7 (4.3-10.8)    | 0.229 |
|                  | CT                          | 9.5 (4-19)       |              | 10 (7-15)       |       |
|                  | TT                          | 10 (4-17)        |              | 8.5 (4.5-17.8)  |       |
|                  | CT+TT                       | 10 (4-19)        | 0.591        | 10 (6-15)       | 0.108 |
| AUDIT            | CC                          | 27 (19-28)       | 0.866        | 5 (3-7)         | 0.925 |
|                  | CT                          | 23 (19-30)       |              | 5 (4-7)         |       |
|                  | TT                          | 23.5 (21-26.8)   |              | 5 (4-7.5)       |       |
|                  | CT+TT                       | 23 (19.3-29)     | 0.591        | 5 (4-7)         | 0.847 |
| OCDS             | CC                          | 16 (12-29)       | 0.671        | 3 (2-4)         | 0.727 |
|                  | CT                          | 17 (8-26)        |              | 3 (2-4)         |       |
|                  | TT                          | 18.5 (14.3-27.8) |              | 3.5 (2.3-4.8)   |       |
|                  | CT+TT                       | 18 (8.3-26.8)    | 0.950        | 3 (2-4)         | 0.907 |
| Zung depression  | CC                          | 32 (26-48)       | 0.992        | 21 (20-22.8)    | 0.180 |
|                  | CT                          | 35 (28-43.8)     |              | 22 (21-25)      |       |
|                  | TT                          | 32.5 (25.5-47.3) |              | 22 (20.3-23.8)  |       |
|                  | CT+TT                       | 34 (27.3-43.8)   | 0.915        | 22 (21-25)      | 0.073 |
| Zung anxiety     | CC                          | 33 (28.5-38)     | 0.835        | 21.5 (20.3-23)  | 0.668 |
|                  | CT                          | 34 (29-39.8)     |              | 22 (20-24)      |       |
|                  | TT                          | 33.5 (31-45.5)   |              | 21.5 (20-26)    |       |
|                  | CT+TT                       | 34 (29-39.8)     | 0.900        | 22 (20-25)      | 0.373 |
| BDHI             | CC                          | 34 (22.5-40.5)   | 0.749        | 14.5 (10.3-21)  | 0.101 |
|                  | CT                          | 30 (22-41)       |              | 18 (12-26)      |       |
|                  | TT                          | 29.5 (22.3-35.8) |              | 10.5 (7-20.8)   |       |
|                  | CT+TT                       | 30 (22-39.5)     | 0.685        | 17 (10-25)      | 0.662 |

\*Kruskal-Wallis test for additive and Mann-Whitney test for dominant model

**Supplementary Table S5.** Associations between *GPX1* rs1050450 and the selected psychosymptomatology scale scores for hospitalized alcohol-dependent patients and healthy controls.

| Scale            | <i>GPX1</i><br>rs1050450<br>genotype | Patients<br>(N=89) |       | Controls<br>(N=93) |       |
|------------------|--------------------------------------|--------------------|-------|--------------------|-------|
|                  |                                      | Median (25-75%)    | P*    | Median (25-75%)    | P*    |
| YBOCS obsession  | CC                                   | 2 (1-6)            | 0.507 | 1 (1-2)            | 0.103 |
|                  | CT                                   | 1.5 (1-9)          |       | 1 (1-1)            |       |
|                  | TT                                   | 1 (1-2)            |       | 1 (1-1)            |       |
|                  | CT+TT                                | 1 (1-7)            | 0.899 | 1 (1-1)            | 0.110 |
| YBOCS compulsion | CC                                   | 1 (1-3)            | 0.500 | 1 (1-1)            | 0.184 |
|                  | CT                                   | 1 (1-2.8)          |       | 1 (1-1.3)          |       |
|                  | TT                                   | 1 (1-1.5)          |       | 1 (1-1)            |       |
|                  | CT+TT                                | 1 (1-2)            | 0.742 | 1 (1-1)            | 0.584 |
| BSPS             | CC                                   | 11 (5-19)          | 0.237 | 7 (4-14)           | 0.161 |
|                  | CT                                   | 8 (3-16.3)         |       | 10.5 (6.8-17.3)    |       |
|                  | TT                                   | 4 (3-9.5)          |       | 7.5 (5.8-10.8)     |       |
|                  | CT+TT                                | 7 (3-14)           | 0.181 | 10 (6.3-14.8)      | 0.133 |
| AUDIT            | CC                                   | 23 (20-27.8)       | 0.447 | 5 (4-7)            | 0.352 |
|                  | CT                                   | 24.5 (19-29)       |       | 4 (3-7)            |       |
|                  | TT                                   | 17 (16.5-26.5)     |       | 5 (4-7)            |       |
|                  | CT+TT                                | 23 (19-29)         | 0.852 | 4 (3-6.8)          | 0.254 |
| OCDS             | CC                                   | 18 (12-26)         | 0.858 | 3 (2-4)            | 0.216 |
|                  | CT                                   | 16.5 (6-31)        |       | 3 (2-4)            |       |
|                  | TT                                   | 16 (15-25.5)       |       | 3.5 (3-5.3)        |       |
|                  | CT+TT                                | 16 (7-29)          | 0.709 | 3 (2-4)            | 0.564 |
| Zung depression  | CC                                   | 31.5 (25-41.8)     | 0.317 | 22 (20-25)         | 0.862 |
|                  | CT                                   | 36.5 (28.8-47.3)   |       | 22 (20.8-24)       |       |
|                  | TT                                   | 32 (29-41.5)       |       | 22.5 (21-24.5)     |       |
|                  | CT+TT                                | 35 (29-47)         | 0.150 | 22 (21-24)         | 0.707 |
| Zung anxiety     | CC                                   | 34 (29.3-39.8)     | 0.592 | 22 (20-24)         | 0.607 |
|                  | CT                                   | 34 (28-39.3)       |       | 21 (20.8-24)       |       |
|                  | TT                                   | 31 (28.5-34)       |       | 22.5 (21-24.3)     |       |
|                  | CT+TT                                | 33 (28-38)         | 0.753 | 21.5 (21-24)       | 0.728 |
| BDHI             | CC                                   | 35 (20-41)         | 0.707 | 15 (10-21)         | 0.943 |
|                  | CT                                   | 29 (22-38.8)       |       | 18 (10.8-23.5)     |       |
|                  | TT                                   | 33 (23-37)         |       | 16.5 (10-25.8)     |       |
|                  | CT+TT                                | 29 (22-38)         | 0.405 | 18 (10.3-24.5)     | 0.735 |

\*Kruskal-Wallis test for additive and Mann-Whitney test for dominant model

**Supplementary Table S6.** Associations between *PON1* rs705381 and the selected psychosymptomatology scale scores for hospitalized alcohol-dependent patients and healthy controls.

| Scale            | <i>PON1</i> rs705381 genotype | Patients (N=89)  |              | Controls (N=93) |              |
|------------------|-------------------------------|------------------|--------------|-----------------|--------------|
|                  |                               | Median (25-75%)  | P*           | Median (25-75%) | P*           |
| YBOCS obsession  | CC                            | 2 (1-7)          | 0.919        | 1 (1-2)         | 0.704        |
|                  | CT                            | 1.5 (1-7)        |              | 1 (1-1)         |              |
|                  | TT                            | 2 (1-9.5)        |              | 1 (1-1.3)       |              |
|                  | CT+TT                         | 2 (1-7)          | 0.965        | 1 (1-1)         | 0.445        |
| YBOCS compulsion | CC                            | 1 (1-2)          | 0.359        | 1 (1-1)         | 0.081        |
|                  | CT                            | 2 (1-5.3)        |              | 1 (1-1)         |              |
|                  | TT                            | 1 (1-4.8)        |              | 1 (1-1)         |              |
|                  | CT+TT                         | 1 (1-5.3)        | 0.457        | 1 (1-1)         | <b>0.027</b> |
| BSPS             | CC                            | 13 (5-19)        | 0.116        | 10 (6.5-14.5)   | 0.192        |
|                  | CT                            | 6.5 (2-17)       |              | 7 (4-14)        |              |
|                  | TT                            | 6.5 (3.5-19.5)   |              | 6 (4-11)        |              |
|                  | CT+TT                         | 6.5 (3-17)       | <b>0.041</b> | 7 (4-13)        | 0.083        |
| AUDIT            | CC                            | 23 (19-29)       | 0.274        | 5 (4-7)         | 0.701        |
|                  | CT                            | 26.5 (20.5-28.5) |              | 4 (3-7.5)       |              |
|                  | TT                            | 21.5 (16.3-27.3) |              | 4.5 (4-5)       |              |
|                  | CT+TT                         | 25.5 (19-28)     | 0.315        | 4 (3-7)         | 0.440        |
| OCDS             | CC                            | 19 (10-28)       | 0.591        | 3 (2-4)         | 0.945        |
|                  | CT                            | 17.5 (6-27.3)    |              | 3 (2-5.5)       |              |
|                  | TT                            | 18 (15.5-18.8)   |              | 3 (2.8-3.3)     |              |
|                  | CT+TT                         | 18 (7.8-22.3)    | 0.315        | 3 (2-5)         | 0.973        |
| Zung depression  | CC                            | 36 (28-45)       | 0.261        | 22 (20-24.5)    | 0.520        |
|                  | CT                            | 31 (25-36.5)     |              | 22 (21-24.5)    |              |
|                  | TT                            | 41 (26.8-47.3)   |              | 21 (20.8-22.3)  |              |
|                  | CT+TT                         | 32 (25.8-45)     | 0.250        | 22 (21-24)      | 0.873        |
| Zung anxiety     | CC                            | 34 (29-39)       | 0.796        | 22 (20.5-24)    | 0.133        |
|                  | CT                            | 33 (28-38.5)     |              | 21 (20.5-25)    |              |
|                  | TT                            | 34.5 (32.3-36)   |              | 20.5 (20-21.3)  |              |
|                  | CT+TT                         | 33.5 (28-38)     | 0.743        | 21 (20-24)      | 0.271        |
| BDHI             | CC                            | 32 (23-41)       | 0.383        | 18 (10-25.5)    | 0.051        |
|                  | CT                            | 28 (20.5-35.8)   |              | 17 (12-21)      |              |
|                  | TT                            | 34 (20.5-37.8)   |              | 8 (5.8-14.3)    |              |
|                  | CT+TT                         | 29 (20.5-37.3)   | 0.188        | 14 (11-21)      | 0.357        |

\*Kruskal-Wallis test for additive and Mann-Whitney test for dominant model

**Supplementary Table S7.** Associations between *PON1* rs705379 and the selected psychosymptomatology scale scores for hospitalized alcohol-dependent patients and healthy controls.

| Scale            | <i>PON1</i><br>rs705379<br>genotype | Patients<br>(N=89) |       | Controls<br>(N=93) |              |
|------------------|-------------------------------------|--------------------|-------|--------------------|--------------|
|                  |                                     | Median (25-75%)    | P*    | Median (25-75%)    | P*           |
| YBOCS obsession  | GG                                  | 1 (1-6)            | 0.825 | 1 (1-1)            | 0.078        |
|                  | GA                                  | 2 (1-7)            |       | 1 (1-1.3)          |              |
|                  | AA                                  | 2 (1-7)            |       | 1 (1-3)            |              |
|                  | GA+AA                               | 2 (1-7)            | 0.570 | 1 (1-2)            | 0.055        |
| YBOCS compulsion | GG                                  | 1 (1-4.5)          | 0.671 | 1 (1-1)            | 0.159        |
|                  | GA                                  | 1 (1-3)            |       | 1 (1-1)            |              |
|                  | AA                                  | 2 (1-5.5)          |       | 1 (1-1.5)          |              |
|                  | GA+AA                               | 1 (1-3)            | 0.437 | 1 (1-1)            | 0.097        |
| BSPS             | GG                                  | 9 (3.5-15.5)       | 0.749 | 6 (4-8.5)          | <b>0.001</b> |
|                  | GA                                  | 10 (3-19)          |       | 9.5 (6-13.3)       |              |
|                  | AA                                  | 10 (6.5-18.5)      |       | 13 (8-22)          |              |
|                  | GA+AA                               | 10 (4-19)          | 0.555 | 10 (7-17)          | <b>0.002</b> |
| AUDIT            | GG                                  | 23 (15.5-28)       | 0.174 | 5 (4-5)            | 0.784        |
|                  | GA                                  | 24 (20-29)         |       | 5 (3-7)            |              |
|                  | AA                                  | 26 (22-29.5)       |       | 5 (3.5-6.5)        |              |
|                  | GA+AA                               | 24.5 (21-29)       | 0.089 | 5 (3-7)            | 0.489        |
| OCDS             | GG                                  | 18 (6.5-24.5)      | 0.607 | 3 (2.5-4)          | 0.944        |
|                  | GA                                  | 18 (9-26)          |       | 3 (2-4)            |              |
|                  | AA                                  | 26 (11.5-30)       |       | 3 (2-4)            |              |
|                  | GA+AA                               | 18 (10.3-27.8)     | 0.502 | 3 (2-4)            | 0.795        |
| Zung depression  | GG                                  | 32 (27.5-46.5)     | 0.896 | 21 (20-22)         | <b>0.005</b> |
|                  | GA                                  | 35 (25-45)         |       | 22 (21-25)         |              |
|                  | AA                                  | 35 (28-43)         |       | 22 (20-27)         |              |
|                  | GA+AA                               | 35 (27-44)         | 0.938 | 22 (21-26)         | <b>0.001</b> |
| Zung anxiety     | GG                                  | 34 (28.5-39.5)     | 0.646 | 21 (20-21.5)       | <b>0.002</b> |
|                  | GA                                  | 33 (29-39)         |       | 22 (21-24.3)       |              |
|                  | AA                                  | 34 (30.5-40)       |       | 23 (21-26)         |              |
|                  | GA+AA                               | 33.5 (29.3-39)     | 0.866 | 22 (21-25)         | <b>0.001</b> |
| BDHI             | GG                                  | 29 (25-40)         | 0.421 | 14 (7.5-16.5)      | <b>0.040</b> |
|                  | GA                                  | 30 (22-38)         |       | 20 (12.8-25)       |              |
|                  | AA                                  | 36 (21-43.5)       |       | 14 (8-24.5)        |              |
|                  | GA+AA                               | 31 (22-40)         | 0.895 | 19 (11-25)         | <b>0.047</b> |

\*Kruskal-Wallis test for additive and Mann-Whitney test for dominant model

**Supplementary Table S8.** Associations between *PON1* rs854560 and the selected psychosymptomatology scale scores for hospitalized alcohol-dependent patients and healthy controls.

| Scale            | <i>PON1</i><br>rs854560<br>genotype | Patients<br>(N=89) |       | Controls<br>(N=93) |              |
|------------------|-------------------------------------|--------------------|-------|--------------------|--------------|
|                  |                                     | Median (25-75%)    | P*    | Median (25-75%)    | P*           |
| YBOCS obsession  | AA                                  | 2 (1-5)            | 0.692 | 1 (1-1)            | <b>0.038</b> |
|                  | AT                                  | 2 (1-9)            |       | 1 (1-1.5)          |              |
|                  | TT                                  | 1 (1-8.5)          |       | 1.5 (1-4)          |              |
|                  | AT+TT                               | 2 (1-8.8)          | 0.520 | 1 (1-2)            | 0.095        |
| YBOCS compulsion | AA                                  | 1 (1-4)            | 0.412 | 1 (1-1)            | 0.341        |
|                  | AT                                  | 1.5 (1-4)          |       | 1 (1-1)            |              |
|                  | TT                                  | 1 (1-2.8)          |       | 1 (1-1.8)          |              |
|                  | AT+TT                               | 1 (1-3)            | 0.592 | 1 (1-1)            | 0.159        |
| BSPS             | AA                                  | 9 (4-17)           | 0.753 | 7 (4-10)           | <b>0.018</b> |
|                  | AT                                  | 10.5 (3.8-19)      |       | 10 (6-13.5)        |              |
|                  | TT                                  | 11 (5-20.3)        |       | 14.5 (7.3-22)      |              |
|                  | AT+TT                               | 10.5 (4-19)        | 0.486 | 10 (7-15)          | <b>0.014</b> |
| AUDIT            | AA                                  | 24 (19-28)         | 0.259 | 4 (3-5)            | 0.181        |
|                  | AT                                  | 25.5 (20.8-30)     |       | 5 (4-7.5)          |              |
|                  | TT                                  | 21 (18.3-24)       |       | 5 (3.3-7)          |              |
|                  | AT+TT                               | 23 (19.3-29)       | 0.779 | 5 (4-7)            | 0.065        |
| OCDS             | AA                                  | 18 (9-24.5)        | 0.716 | 3 (2-4)            | 0.515        |
|                  | AT                                  | 18 (10.8-28.3)     |       | 3 (2-4)            |              |
|                  | TT                                  | 12 (7.5-26)        |       | 3.5 (2-6)          |              |
|                  | AT+TT                               | 17 (8.5-27.8)      | 0.961 | 3 (2-4)            | 0.293        |
| Zung depression  | AA                                  | 35 (28.5-45)       | 0.147 | 22 (20-23)         | 0.094        |
|                  | AT                                  | 35 (27-48)         |       | 22 (20-24.5)       |              |
|                  | TT                                  | 29.5 (25-31.8)     |       | 23.5 (22-27)       |              |
|                  | AT+TT                               | 32.5 (27-44.3)     | 0.415 | 22 (20.5-25.5)     | 0.108        |
| Zung anxiety     | AA                                  | 35 (29.5-43)       | 0.225 | 21 (20-22)         | <b>0.005</b> |
|                  | AT                                  | 33.5 (28-39)       |       | 22 (20-25.5)       |              |
|                  | TT                                  | 32 (29.8-33.3)     |       | 23.5 (21.3-28)     |              |
|                  | AT+TT                               | 32 (29-37.5)       | 0.115 | 23 (21-26)         | <b>0.003</b> |
| BDHI             | AA                                  | 33 (26-40.5)       | 0.091 | 15 (11-21)         | 0.176        |
|                  | AT                                  | 32 (21.8-41)       |       | 17 (10-23)         |              |
|                  | TT                                  | 21 (14-31.3)       |       | 21.5 (14.3-33)     |              |
|                  | AT+TT                               | 29 (20.3-39.5)     | 0.165 | 18 (10-25.5)       | 0.331        |

\*Kruskal-Wallis test for additive and Mann-Whitney test for dominant model



**Supplementary Table S9.** Associations between *PON1* rs662 and the selected psychosymptomatology scale scores for hospitalized alcohol-dependent patients and healthy controls.

| Scale            | <i>PON1</i> rs662 genotype | Patients (N=89)  |       | Controls (N=93)  |       |
|------------------|----------------------------|------------------|-------|------------------|-------|
|                  |                            | Median (25-75%)  | P*    | Median (25-75%)  | P*    |
| YBOCS obsession  | AA                         | 1 (1-9)          | 0.818 | 1 (1-2)          | 0.340 |
|                  | AG                         | 2 (1-6)          |       | 1 (1-1)          |       |
|                  | GG                         | 2.5 (1-8)        |       | 1 (1-1)          |       |
|                  | AG+GG                      | 2 (1-6)          | 0.951 | 1 (1-1)          | 0.414 |
| YBOCS compulsion | AA                         | 1 (1-4)          | 0.619 | 1 (1-1)          | 0.520 |
|                  | AG                         | 1.5 (1-3)        |       | 1 (1-1)          |       |
|                  | GG                         | 1.5 (1-8)        |       | 1 (1-1)          |       |
|                  | AG+GG                      | 1.5 (1-3)        | 0.376 | 1 (1-1)          | 0.976 |
| BSPS             | AA                         | 9 (4-19)         | 0.986 | 10 (6.3-17.3)    | 0.348 |
|                  | AG                         | 10 (3.8-19)      |       | 8 (5-13)         |       |
|                  | GG                         | 12.5 (4.8-16.3)  |       | 8 (6.8-11.8)     |       |
|                  | AG+GG                      | 11.5 (4-17.8)    | 0.935 | 8 (5-13)         | 0.151 |
| AUDIT            | AA                         | 23 (19.5-29.5)   | 0.542 | 5 (4-7)          | 0.410 |
|                  | AG                         | 24.5 (19-28.3)   |       | 4 (3-6)          |       |
|                  | GG                         | 22 (15.8-25.5)   |       | 5 (4.8-5.3)      |       |
|                  | AG+GG                      | 23 (19-28)       | 0.538 | 5 (3.5-6)        | 0.229 |
| OCDS             | AA                         | 17 (7-26)        | 0.449 | 3 (2-4)          | 0.413 |
|                  | AG                         | 17 (12-30.3)     |       | 3 (2-4)          |       |
|                  | GG                         | 20.5 (15-26)     |       | 2 (2-4)          |       |
|                  | AG+GG                      | 18.5 (12.5-29.3) | 0.227 | 3 (2-4)          | 0.895 |
| Zung depression  | AA                         | 32 (27.5-43.5)   | 0.911 | 22 (20-24.8)     | 0.937 |
|                  | AG                         | 35 (25-47.3)     |       | 22 (20-24)       |       |
|                  | GG                         | 32.5 (28.5-44)   |       | 22.5 (20.8-23.3) |       |
|                  | AG+GG                      | 34.5 (25.5-45.8) | 0.921 | 22 (20.5-24)     | 0.751 |
| Zung anxiety     | AA                         | 32 (29.5-37.5)   | 0.563 | 21 (21-24)       | 0.395 |
|                  | AG                         | 35 (29-39.3)     |       | 22 (20-24)       |       |
|                  | GG                         | 33.5 (26.5-42.5) |       | 20.5 (20-22.5)   |       |
|                  | AG+GG                      | 35 (29-39.8)     | 0.438 | 22 (20-23.5)     | 0.614 |
| BDHI             | AA                         | 29 (19.5-39)     | 0.644 | 17.5 (10.3-23.5) | 0.944 |
|                  | AG                         | 33 (24.8-41)     |       | 15 (10-23)       |       |
|                  | GG                         | 30 (26.5-40.8)   |       | 16.5 (12.5-21.8) |       |
|                  | AG+GG                      | 31 (25.3-40.8)   | 0.353 | 15 (10.5-23)     | 0.743 |

\*Kruskal-Wallis test for additive and Mann-Whitney test for dominant model

**Supplementary Table S10.** Associations between *IL1B* rs1143623 and the selected psychosymptomatology scale scores for hospitalized alcohol-dependent patients and healthy controls.

| Scale            | <i>IL1B</i><br>rs1143623<br>genotype | Patients<br>(N=89) |       | Controls<br>(N=93) |       |
|------------------|--------------------------------------|--------------------|-------|--------------------|-------|
|                  |                                      | Median (25-75%)    | P*    | Median (25-75%)    | P*    |
| YBOCS obsession  | GG                                   | 2 (1-6)            | 0.657 | 1 (1-2)            | 0.309 |
|                  | GC                                   | 2 (1-8.5)          |       | 1 (1-1.8)          |       |
|                  | CC                                   | 1 (1-4.5)          |       | 1 (1-1)            |       |
|                  | GC+CC                                | 2 (1-7.3)          | 0.758 | 1 (1-1)            | 0.503 |
| YBOCS compulsion | GG                                   | 1 (1-3)            | 0.778 | 1 (1-1)            | 0.386 |
|                  | GC                                   | 1 (1-5.5)          |       | 1 (1-1)            |       |
|                  | CC                                   | 1 (1-2.5)          |       | 1 (1-1)            |       |
|                  | GC+CC                                | 1 (1-5)            | 0.645 | 1 (1-1)            | 0.312 |
| BSPS             | GG                                   | 14 (3-19)          | 0.587 | 9 (7-13.5)         | 0.564 |
|                  | GC                                   | 9 (4-15)           |       | 7 (4-16.5)         |       |
|                  | CC                                   | 17 (8-18)          |       | 10 (4-13)          |       |
|                  | GC+CC                                | 9 (4-17)           | 0.778 | 7 (4-15)           | 0.284 |
| AUDIT            | GG                                   | 23 (20-29)         | 0.366 | 5 (4-7)            | 0.447 |
|                  | GC                                   | 23 (19-27.5)       |       | 4.5 (3-6.5)        |       |
|                  | CC                                   | 28 (23-32)         |       | 5 (4-7)            |       |
|                  | GC+CC                                | 23 (19-28)         | 0.865 | 5 (3-7)            | 0.294 |
| OCDS             | GG                                   | 16 (7-23)          | 0.561 | 3 (2-4)            | 0.694 |
|                  | GC                                   | 18 (11.5-27.5)     |       | 3 (2-5)            |       |
|                  | CC                                   | 18 (11.5-32)       |       | 3 (3-4)            |       |
|                  | GC+CC                                | 18 (11.8-28.3)     | 0.313 | 3 (2-5)            | 0.483 |
| Zung depression  | GG                                   | 36 (29-46)         | 0.189 | 22 (20.5-24.5)     | 0.890 |
|                  | GC                                   | 31 (26.5-42.5)     |       | 22 (20-24.8)       |       |
|                  | CC                                   | 41 (33-50.5)       |       | 22 (20-23)         |       |
|                  | GC+CC                                | 32 (27-43.5)       | 0.451 | 22 (20-24)         | 0.715 |
| Zung anxiety     | GG                                   | 34 (29-39)         | 0.296 | 22 (20.5-24)       | 0.864 |
|                  | GC                                   | 33 (30-38)         |       | 21.5 (20-23.8)     |       |
|                  | CC                                   | 44 (32-49)         |       | 22 (20-26)         |       |
|                  | GC+CC                                | 33 (30-39.3)       | 0.763 | 22 (20-24)         | 0.883 |
| BDHI             | GG                                   | 29 (22-40)         | 0.430 | 18 (10-23)         | 0.897 |
|                  | GC                                   | 34 (20.5-40)       |       | 15 (11-23)         |       |
|                  | CC                                   | 36 (28-46.5)       |       | 17 (8-28)          |       |
|                  | GC+CC                                | 34.5 (21-40.3)     | 0.449 | 15 (11-23)         | 0.959 |

\*Kruskal-Wallis test for additive and Mann-Whitney test for dominant model

**Supplementary Table S11.** Associations between *IL1B* rs16944 and the selected psychosymptomatology scale scores for hospitalized alcohol-dependent patients and healthy controls.

| Scale            | <i>IL1B</i><br>rs16944<br>genotype | Patients<br>(N=89) |       | Controls<br>(N=93) |       |
|------------------|------------------------------------|--------------------|-------|--------------------|-------|
|                  |                                    | Median (25-75%)    | P*    | Median (25-75%)    | P*    |
| YBOCS obsession  | TT                                 | 2 (1-8.5)          | 0.978 | 1 (1-1)            | 0.204 |
|                  | TC                                 | 1.5 (1-7)          |       | 1 (1-2)            |       |
|                  | CC                                 | 2 (1-6)            |       | 1 (1-1.5)          |       |
|                  | TC+CC                              | 2 (1-6.8)          | 0.834 | 1 (1-2)            | 0.082 |
| YBOCS compulsion | TT                                 | 2 (1-7.5)          | 0.547 | 1 (1-1)            | 0.362 |
|                  | TC                                 | 1 (1-4.3)          |       | 1 (1-1)            |       |
|                  | CC                                 | 1 (1-2.8)          |       | 1 (1-1)            |       |
|                  | TC+CC                              | 1 (1-2.8)          | 0.282 | 1 (1-1)            | 0.167 |
| BSPS             | TT                                 | 9 (4-17)           | 0.726 | 10 (4.5-13.5)      | 0.606 |
|                  | TC                                 | 9 (4-16.8)         |       | 7 (4-15)           |       |
|                  | CC                                 | 14 (4-19.8)        |       | 9 (6.5-14.5)       |       |
|                  | TC+CC                              | 10 (4-19)          | 0.624 | 9 (6-15)           | 0.921 |
| AUDIT            | TT                                 | 27 (22-30.5)       | 0.293 | 5 (3.5-6)          | 0.767 |
|                  | TC                                 | 23 (19-27)         |       | 5 (3-6.3)          |       |
|                  | CC                                 | 24.5 (19.3-30.8)   |       | 5 (4-7)            |       |
|                  | TC+CC                              | 23 (19-28)         | 0.223 | 5 (4-7)            | 0.775 |
| OCDS             | TT                                 | 18 (6-24.5)        | 0.836 | 3 (2-4)            | 0.412 |
|                  | TC                                 | 18 (12-27)         |       | 3 (2-5)            |       |
|                  | CC                                 | 16 (7.3-26)        |       | 3 (2-4)            |       |
|                  | TC+CC                              | 17.5 (9.3-26.8)    | 0.688 | 3 (2-4)            | 0.822 |
| Zung depression  | TT                                 | 37 (29.5-47)       | 0.571 | 22 (20.5-22.5)     | 0.859 |
|                  | TC                                 | 31 (26.3-44.5)     |       | 22 (20-25.3)       |       |
|                  | CC                                 | 35.5 (29-45.5)     |       | 22 (20-24.5)       |       |
|                  | TC+CC                              | 33 (27-44.8)       | 0.513 | 22 (20-25)         | 0.584 |
| Zung anxiety     | TT                                 | 34 (28.5-46)       | 0.677 | 23 (21-25)         | 0.616 |
|                  | TC                                 | 33 (28.3-38.5)     |       | 21.5 (20-23)       |       |
|                  | CC                                 | 34 (29-40.5)       |       | 21 (20-24.5)       |       |
|                  | TC+CC                              | 33.5 (29-39)       | 0.723 | 21 (20-24)         | 0.360 |
| BDHI             | TT                                 | 36 (28-41.5)       | 0.607 | 17 (8-24.5)        | 0.995 |
|                  | TC                                 | 32 (21.5-39.5)     |       | 15 (11-23)         |       |
|                  | CC                                 | 29 (22-40.8)       |       | 18 (10-23)         |       |
|                  | TC+CC                              | 30 (22-40)         | 0.327 | 17 (11-23)         | 0.948 |

\*Kruskal-Wallis test for additive and Mann-Whitney test for dominant model

**Supplementary Table S12.** Associations between *IL1B* rs1071676 and the selected psychosymptomatology scale scores for hospitalized alcohol-dependent patients and healthy controls.

| Scale            | <i>IL1B</i><br>rs1071676<br>genotype | Patients<br>(N=89) |              | Controls<br>(N=93) |       |
|------------------|--------------------------------------|--------------------|--------------|--------------------|-------|
|                  |                                      | Median (25-75%)    | P*           | Median (25-75%)    | P*    |
| YBOCS obsession  | GG                                   | 1 (1-5.5)          | 0.712        | 1 (1-1)            | 0.375 |
|                  | GC                                   | 2 (1-7)            |              | 1 (1-1.5)          |       |
|                  | CC                                   | 3.5 (1-15.8)       |              | 1 (1-4)            |       |
|                  | GC+CC                                | 2 (1-7)            | 0.416        | 1 (1-2)            | 0.342 |
| YBOCS compulsion | GG                                   | 1 (1-2.3)          | 0.573        | 1 (1-1)            | 0.092 |
|                  | GC                                   | 1 (1-6)            |              | 1 (1-1)            |       |
|                  | CC                                   | 1 (1-2.5)          |              | 1 (1-2)            |       |
|                  | GC+CC                                | 1 (1-5)            | 0.627        | 1 (1-1)            | 0.166 |
| BSPS             | GG                                   | 10 (3.8-17.3)      | 0.995        | 8 (5-12.5)         | 0.456 |
|                  | GC                                   | 9 (4-19)           |              | 10 (6-16.5)        |       |
|                  | CC                                   | 11.5 (2-32.3)      |              | 8 (3-16)           |       |
|                  | GC+CC                                | 9 (4-21)           | 0.923        | 10 (6-15)          | 0.431 |
| AUDIT            | GG                                   | 25 (20-30)         | <b>0.045</b> | 5 (4-6)            | 0.821 |
|                  | GC                                   | 23 (19-27)         |              | 5 (3-7)            |       |
|                  | CC                                   | 13.5 (8.8-23.5)    |              | 4.5 (3.8-5.8)      |       |
|                  | GC+CC                                | 22 (17-27)         | 0.069        | 5 (3-7)            | 0.770 |
| OCDS             | GG                                   | 17.5 (8.8-27.3)    | 0.360        | 3 (2-4)            | 0.950 |
|                  | GC                                   | 20 (12-26)         |              | 3 (2-4)            |       |
|                  | CC                                   | 8 (3-25.8)         |              | 3 (2-4.5)          |       |
|                  | GC+CC                                | 19 (9-26)          | 0.804        | 3 (2-4)            | 0.907 |
| Zung depression  | GG                                   | 32.5 (27.8-45)     | 0.751        | 22 (20-23.5)       | 0.885 |
|                  | GC                                   | 35 (27-45)         |              | 22 (20.5-25.5)     |       |
|                  | CC                                   | 31 (24.3-46.8)     |              | 22 (20-27)         |       |
|                  | GC+CC                                | 35 (27-45)         | 0.626        | 22 (20-26)         | 0.665 |
| Zung anxiety     | GG                                   | 32 (28-37)         | 0.054        | 22 (20-23.5)       | 0.868 |
|                  | GC                                   | 36 (32-42)         |              | 21 (20-25.5)       |       |
|                  | CC                                   | 29.5 (23.8-45.8)   |              | 22.5 (20-24.3)     |       |
|                  | GC+CC                                | 35 (31-42)         | 0.050        | 22 (20-25)         | 0.662 |
| BDHI             | GG                                   | 34.5 (21.8-42)     | 0.438        | 16 (11-25.5)       | 0.287 |
|                  | GC                                   | 30 (25-37)         |              | 15 (9-20.5)        |       |
|                  | CC                                   | 24 (12-36)         |              | 21.5 (13.3-28)     |       |
|                  | GC+CC                                | 30 (24-37)         | 0.380        | 18 (10-22)         | 0.664 |

\*Kruskal-Wallis test for additive and Mann-Whitney test for dominant model

**Supplementary Table S13.** Associations between *MIRN146A* rs2910164 and the selected psychosymptomatology scale scores for hospitalized alcohol-dependent patients and healthy controls.

| Scale            | <i>MIRN146A</i><br>rs2910164<br>genotype | Patients<br>(N=89) |       | Controls<br>(N=93) |       |
|------------------|------------------------------------------|--------------------|-------|--------------------|-------|
|                  |                                          | Median (25-75%)    | P*    | Median (25-75%)    | P*    |
| YBOCS obsession  | GG                                       | 2 (1-7)            | 0.482 | 1 (1-2)            | 0.426 |
|                  | GC                                       | 1 (1-4)            |       | 1 (1-1)            |       |
|                  | CC                                       | 2 (1-6)            |       | 1 (1-1)            |       |
|                  | GC+CC                                    | 1 (1-4.5)          | 0.236 | 1 (1-1)            | 0.478 |
| YBOCS compulsion | GG                                       | 1 (1-3)            | 0.357 | 1 (1-1)            | 0.462 |
|                  | GC                                       | 1 (1-3)            |       | 1 (1-1)            |       |
|                  | CC                                       | 2 (1-7)            |       | 1 (1-1)            |       |
|                  | GC+CC                                    | 1 (1-6)            | 0.580 | 1 (1-1)            | 0.315 |
| BSPS             | GG                                       | 10 (4-19)          | 0.152 | 8 (5-14)           | 0.680 |
|                  | GC                                       | 7 (3-17)           |       | 10 (7-14)          |       |
|                  | CC                                       | 19 (5-26)          |       | 12 (4.5-15)        |       |
|                  | GC+CC                                    | 9.5 (3.8-18.3)     | 0.826 | 10 (7-14)          | 0.382 |
| AUDIT            | GG                                       | 25 (19-30)         | 0.576 | 5 (4-7)            | 0.218 |
|                  | GC                                       | 22 (20-27)         |       | 5 (4-6)            |       |
|                  | CC                                       | 25 (23-29)         |       | 3 (2-5.5)          |       |
|                  | GC+CC                                    | 23 (20-28)         | 0.705 | 5 (3-6)            | 0.518 |
| OCDS             | GG                                       | 18 (9-28)          | 0.142 | 3 (2-4)            | 0.782 |
|                  | GC                                       | 16 (7-23)          |       | 3 (2-4)            |       |
|                  | CC                                       | 22 (19-30)         |       | 2 (2-5)            |       |
|                  | GC+CC                                    | 18 (10.3-23.8)     | 0.891 | 3 (2-4)            | 0.626 |
| Zung depression  | GG                                       | 35 (29-44)         | 0.069 | 22 (20-24.5)       | 0.890 |
|                  | GC                                       | 29 (25-40)         |       | 22 (20-24)         |       |
|                  | CC                                       | 45 (34-49)         |       | 22 (21-22.5)       |       |
|                  | GC+CC                                    | 30.5 (25-45.8)     | 0.222 | 22 (20-23.8)       | 0.630 |
| Zung anxiety     | GG                                       | 34 (29-39)         | 0.846 | 22 (21-24.5)       | 0.474 |
|                  | GC                                       | 33 (29-40)         |       | 22 (20-24)         |       |
|                  | CC                                       | 35 (27-44)         |       | 21 (20.5-21.5)     |       |
|                  | GC+CC                                    | 33.5 (28.8-40.3)   | 0.842 | 22 (20-23.8)       | 0.402 |
| BDHI             | GG                                       | 32 (22-40)         | 0.823 | 18 (11.5-23.5)     | 0.178 |
|                  | GC                                       | 30 (23-40)         |       | 15 (10-25)         |       |
|                  | CC                                       | 35 (14-46)         |       | 11 (6-15)          |       |
|                  | GC+CC                                    | 30 (22.8-40.3)     | 0.983 | 14.5 (10-21.8)     | 0.339 |

\*Kruskal-Wallis test for additive and Mann-Whitney test for dominant model

**Supplementary Table S14.** Associations between *IL6* rs1800795 and the selected psychosymptomatology scale scores for hospitalized alcohol-dependent patients and healthy controls.

| Scale            | <i>IL6</i><br>rs1800795<br>genotype | Patients<br>(N=89) |       | Controls<br>(N=93) |       |
|------------------|-------------------------------------|--------------------|-------|--------------------|-------|
|                  |                                     | Median (25-75%)    | P*    | Median (25-75%)    | P*    |
| YBOCS obsession  | GG                                  | 2 (1-7)            | 0.351 | 1 (1-1)            | 0.161 |
|                  | GC                                  | 1 (1-5)            |       | 1 (1-2)            |       |
|                  | CC                                  | 1 (1-14)           |       | 1 (1-1)            |       |
|                  | GC+CC                               | 1 (1-6)            | 0.259 | 1 (1-2)            | 0.190 |
| YBOCS compulsion | GG                                  | 1 (1-5.5)          | 0.319 | 1 (1-1)            | 0.460 |
|                  | GC                                  | 1 (1-2)            |       | 1 (1-1)            |       |
|                  | CC                                  | 2 (1-9.5)          |       | 1 (1-1)            |       |
|                  | GC+CC                               | 1 (1-2)            | 0.487 | 1 (1-1)            | 0.483 |
| BSPS             | GG                                  | 9 (3-17.5)         | 0.684 | 7 (5-13)           | 0.590 |
|                  | GC                                  | 10 (4-19)          |       | 9 (6.5-15.5)       |       |
|                  | CC                                  | 11 (5.5-28.5)      |       | 10 (6-14.5)        |       |
|                  | GC+CC                               | 10 (4-19)          | 0.815 | 9 (6-14.5)         | 0.305 |
| AUDIT            | GG                                  | 23 (19.5-28.5)     | 0.646 | 4 (3-5)            | 0.093 |
|                  | GC                                  | 24 (19-31)         |       | 5 (4-7)            |       |
|                  | CC                                  | 22 (16.5-28)       |       | 5 (2.5-6)          |       |
|                  | GC+CC                               | 23 (19-28.8)       | 0.828 | 5 (4-7)            | 0.057 |
| OCDS             | GG                                  | 18 (8-28)          | 0.736 | 3 (2-4)            | 0.200 |
|                  | GC                                  | 15 (8-26)          |       | 3 (2.5-4)          |       |
|                  | CC                                  | 17 (16-24.5)       |       | 3 (2-4)            |       |
|                  | GC+CC                               | 16.5 (9.3-25.5)    | 0.543 | 3 (2-4)            | 0.187 |
| Zung depression  | GG                                  | 35 (28-46.5)       | 0.487 | 22 (21-24)         | 0.951 |
|                  | GC                                  | 33 (27-45)         |       | 22 (20-25)         |       |
|                  | CC                                  | 32 (24.5-37)       |       | 22 (20-23.8)       |       |
|                  | GC+CC                               | 32 (26.3-42.3)     | 0.382 | 22 (20-24.5)       | 0.923 |
| Zung anxiety     | GG                                  | 34 (29-39)         | 0.142 | 22 (21-25)         | 0.506 |
|                  | GC                                  | 34 (30-40)         |       | 21 (20-24)         |       |
|                  | CC                                  | 29 (24.5-35.5)     |       | 21.5 (20-23)       |       |
|                  | GC+CC                               | 33 (29-39)         | 0.705 | 21 (20-24)         | 0.260 |
| BDHI             | GG                                  | 30 (23.5-39)       | 0.783 | 17 (10-23)         | 0.413 |
|                  | GC                                  | 32 (22-41)         |       | 14 (9-22)          |       |
|                  | CC                                  | 25 (21-39.5)       |       | 18.5 (12-28)       |       |
|                  | GC+CC                               | 31 (22-40.8)       | 0.832 | 17 (10.5-22.5)     | 0.990 |

\*Kruskal-Wallis test for additive and Mann-Whitney test for dominant model

**Supplementary Table S15.** Associations between *IL6R* rs2228145 and the selected psychosymptomatology scale scores for hospitalized alcohol-dependent patients and healthy controls.

| Scale            | <i>IL6R</i><br>rs2228145<br>genotype | Patients<br>(N=89) |              | Controls<br>(N=93) |              |
|------------------|--------------------------------------|--------------------|--------------|--------------------|--------------|
|                  |                                      | Median (25-75%)    | P*           | Median (25-75%)    | P*           |
| YBOCS obsession  | AA                                   | 2 (1-6)            | 0.123        | 1 (1-2)            | 0.510        |
|                  | AC                                   | 1 (1-6.8)          |              | 1 (1-1)            |              |
|                  | CC                                   | 5 (1-12)           |              | 1 (1-1)            |              |
|                  | AC+CC                                | 2 (1-9)            | 0.467        | 1 (1-1)            | 0.439        |
| YBOCS compulsion | AA                                   | 1.5 (1-5.3)        | <b>0.033</b> | 1 (1-1)            | 0.127        |
|                  | AC                                   | 1 (1-2)            |              | 1 (1-1)            |              |
|                  | CC                                   | 2 (1-9)            |              | 1 (1-1)            |              |
|                  | AC+CC                                | 1 (1-3)            | 0.328        | 1 (1-1)            | 0.204        |
| BSPS             | AA                                   | 11 (4.8-23.3)      | 0.099        | 9 (7-17)           | 0.080        |
|                  | AC                                   | 10 (4.3-17)        |              | 9.5 (6-13.8)       |              |
|                  | CC                                   | 4 (1-16)           |              | 4 (3.3-10.8)       |              |
|                  | AC+CC                                | 9 (3-17)           | 0.104        | 8.5 (4-13)         | 0.313        |
| AUDIT            | AA                                   | 23 (19-29.3)       | 0.450        | 5 (4-8)            | 0.232        |
|                  | AC                                   | 25 (20-28.8)       |              | 4.5 (3-6)          |              |
|                  | CC                                   | 22 (16-27)         |              | 5 (3.3-5)          |              |
|                  | AC+CC                                | 24 (19-28)         | 0.749        | 5 (3-6)            | 0.088        |
| OCDS             | AA                                   | 18 (12-27.3)       | 0.808        | 3 (2-5)            | 0.298        |
|                  | AC                                   | 18 (8-26)          |              | 3 (2-4)            |              |
|                  | CC                                   | 16 (7-27)          |              | 3 (3-4)            |              |
|                  | AC+CC                                | 18 (8-26)          | 0.542        | 3 (2-4)            | 0.269        |
| Zung depression  | AA                                   | 33.5 (27-48)       | 0.186        | 22 (21-25)         | 0.173        |
|                  | AC                                   | 35.5 (29-44.8)     |              | 22 (20.3-24)       |              |
|                  | CC                                   | 32 (23-37)         |              | 21 (20-22.8)       |              |
|                  | AC+CC                                | 34 (27-42)         | 0.517        | 21.5 (20-23.8)     | 0.096        |
| Zung anxiety     | AA                                   | 32.5 (27.8-41.3)   | 0.467        | 22 (21-25)         | 0.440        |
|                  | AC                                   | 34.5 (30.5-38.8)   |              | 22 (20.3-24)       |              |
|                  | CC                                   | 31 (29-36)         |              | 21 (20-22.8)       |              |
|                  | AC+CC                                | 34 (30-38)         | 0.558        | 21.5 (20-24)       | 0.465        |
| BDHI             | AA                                   | 29.5 (19.8-40.3)   | 0.739        | 20 (14-26)         | <b>0.014</b> |
|                  | AC                                   | 33 (27.3-38)       |              | 14.5 (8.5-22.5)    |              |
|                  | CC                                   | 27 (21-41)         |              | 12 (11-16.8)       |              |
|                  | AC+CC                                | 32 (25-40)         | 0.595        | 14 (10-20.8)       | <b>0.004</b> |

\*Kruskal-Wallis test for additive and Mann-Whitney test for dominant model

**Supplementary Table S16.** Thermal cycling conditions used for *GPX1* rs1050450, *IL1 $\beta$*  rs1143623 and rs16944, *IL6* rs1800795, *IL6R* rs2228145, miR146a rs2910164, *PON1* rs854560 and rs662, and *SOD2* rs4880 genotyping.

|                          | <b>61-55°C Touchdown protocol</b>                                                                   |                 |                         |
|--------------------------|-----------------------------------------------------------------------------------------------------|-----------------|-------------------------|
| <b>Stage</b>             | <b>Temperature</b>                                                                                  | <b>Duration</b> | <b>Number of cycles</b> |
| Hot-start Taq activation | 94°C                                                                                                | 15 min          | 1                       |
| Touchdown                | 94°C                                                                                                | 20 s            | 10                      |
|                          | 61°C (61°C decreasing 0.6°C per cycle to achieve a final annealing / extension temperature of 55°C) | 60 s            |                         |
| Amplification            | 94°C                                                                                                | 20 s            | 30                      |
|                          | 55°C                                                                                                | 60 s            |                         |
| Read stage               | 30°C                                                                                                | 60 s            | 1                       |

**Supplementary Table S17.** Thermal cycling conditions used for *PON1* rs705379 and rs705381 genotyping.

|                          | <b>68-62°C Touchdown protocol</b>                                                                   |                 |                         |
|--------------------------|-----------------------------------------------------------------------------------------------------|-----------------|-------------------------|
| <b>Stage</b>             | <b>Temperature</b>                                                                                  | <b>Duration</b> | <b>Number of cycles</b> |
| Hot-start Taq activation | 94°C                                                                                                | 15 min          | 1                       |
| Touchdown                | 94°C                                                                                                | 20 s            | 10                      |
|                          | 68°C (68°C decreasing 0.6°C per cycle to achieve a final annealing / extension temperature of 62°C) | 60 s            |                         |
| Amplification            | 94°C                                                                                                | 20 s            | 30                      |
|                          | 62°C                                                                                                | 60 s            |                         |
| Read stage               | 30°C                                                                                                | 60 s            | 1                       |

**Supplementary Table S18.** Thermal cycling conditions used for *IL1 $\beta$*  rs1071676 genotyping.

|                          | <b>68-62°C Touchdown protocol</b> |                 |                         |
|--------------------------|-----------------------------------|-----------------|-------------------------|
| <b>Stage</b>             | <b>Temperature</b>                | <b>Duration</b> | <b>Number of cycles</b> |
| Hot-start Taq activation | 94°C                              | 15 min          | 1                       |
| Amplification            | 94°C                              | 20 s            | 36                      |
|                          | 57°C                              | 60 s            |                         |
